# Supplementary material for: Exo-Metabolites of Phaseolus vulgaris-Nodulating Rhizobial Strains
Source: MDPI journal article supplement (doi:10.3390/metabo9060105), 2019-05-30
Supplement: s1 [file s1]

**Table S1.** Chemical shifts of the compounds identified by  $^1\text{H}$  NMR (700 MHz, 298K, TSP=1mM,  $\text{D}_2\text{O}$  sodium phosphate buffer 0.123M at pH 7.4). TSP was used as internal standard and referenced to chemical shift 0.000 ppm.

| #  | Molecule                    | $^1\text{H}$ NMR Chemical shifts(ppm)                                                       |
|----|-----------------------------|---------------------------------------------------------------------------------------------|
| 1  | Formate                     | 8.46 (s).                                                                                   |
| 2  | S-Adenosylhomocysteine      | 8.38 (s), 8.28 (s).                                                                         |
| 3  | Oxypurinol                  | 8.21 (s).                                                                                   |
| 4  | UDP-glucose                 | 7.96 (d, $J = 8.4$ Hz).                                                                     |
| 5  | Phenylalanine               | 7.43 (t, $J=7.2$ Hz), 7.34 (d, $J=7.6$ Hz).                                                 |
| 6  | Tyrosine                    | 7.21-7.19 (m), 6.93-6.89 (m).                                                               |
| 7  | Glucose-1-phosphate         | 5.46 (dd, $J = 7.4, 3.5$ Hz).                                                               |
| 8  | Sucrose                     | 5.42 (d, $J = 3.9$ Hz), 4.22 (d, $J = 8.8$ Hz), 4.06 (t, $J = 8.6$ Hz),<br>3.92 – 3.83 (m), |
|    |                             | 3.69 (d, $J = 1.9$ Hz), 3.57 (dd, $J = 10.0, 3.9$ Hz), 3.48 (t, $J = 9.5$ Hz, 0H)           |
| 9  | Glucose                     | 5.24 (d, $J = 3.7$ Hz), 4.65 (d, $J = 8.0$ Hz).                                             |
| 10 | Maltose                     | 5.24 (d, $J = 3.7$ Hz), 4.65 (d, $J = 8.0$ Hz), 3.31 – 3.28 (m).                            |
| 11 | Trehalose                   | 5.20 (d, $J = 3.7$ Hz).                                                                     |
| 12 | Tartrate                    | 4.35 (s).                                                                                   |
| 13 | Pyroglutamate               | 4.18 (dd, $J = 9.0, 5.8$ Hz), 2.51 (dtd, $J = 12.9, 9.1, 6.8$ Hz).                          |
| 14 | Gluconate                   | 4.14 (d, $J = 3.7$ Hz).                                                                     |
| 15 | Methanol                    | 3.36 (s).                                                                                   |
| 16 | Dimethyl sulfone            | 3.16 (s).                                                                                   |
| 17 | Malonate                    | 3.14 (s).                                                                                   |
| 18 | Ornithine                   | 3.07-3.04 (m).                                                                              |
| 19 | 2-Oxoglutarate              | 3.01 (t, $J = 6.9$ Hz).                                                                     |
| 20 | N,N-Dimethylglycine         | 2.92 (s).                                                                                   |
| 21 | Aspartate                   | 2.82 (dd, $J = 17.5, 3.8$ Hz), 2.69 (dd, $J = 17.5, 8.7$ Hz).                               |
| 22 | Glutamate                   | 2.35 (m), 2.14 (dddd, $J = 15.2, 8.4, 7.2, 4.8$ Hz), 2.07(m).                               |
| 23 | Acetone                     | 2.24 (s).                                                                                   |
| 24 | Methionine                  | 2.16 (s).                                                                                   |
| 25 | Homoserine                  | 1.97 (dq, $J = 14.7, 7.6$ Hz).                                                              |
| 26 | Acetate                     | 1.92 (s).                                                                                   |
| 27 | Alanine                     | 1.49 (d, $J = 7.3$ Hz).                                                                     |
| 28 | Threonine                   | 1.33 (d, $J = 6.9$ Hz).                                                                     |
| 29 | Lactate                     | 1.33 (d, $J= 6.9$ Hz).                                                                      |
| 30 | 3-Hydroxy-3-methylglutarate | 1.33 (s).                                                                                   |
| 31 | 3-Hydroxyisovalerate        | 1.25 (s).                                                                                   |
| 32 | 3-Hydroxybutyrate           | 1.21 (d, $J = 6.6$ Hz).                                                                     |
| 33 | Ethanol                     | 1.19 (t, $J = 7.1$ Hz).                                                                     |
| 34 | 3-hydroxyisobutyrate        | 1.07 (d, $J = 7.1$ Hz).                                                                     |
| 35 | Valine                      | 1.05 (d, $J = 7.1$ Hz), 1.00 (d, $J = 7.0$ Hz).                                             |
| 36 | 3-Methylglutarate           | 0.91 (d, $J = 6.6$ Hz).                                                                     |
| 37 | Caprylate                   | 0.87 (t, $J = 7.0$ Hz).                                                                     |
