# Supplementary material for: Exo-Metabolites of Phaseolus vulgaris-Nodulating Rhizobial Strains
Source: MDPI journal article supplement (doi:10.3390/metabo9060105), 2019-05-30
Supplement: s1 [file s1]

**Table S4.** Results of one-way ANOVA (p-values) and Tukey's HSD post hoc test with 95% confidence interval (p-values adjusted) calculated in R. <sup>(a)</sup> compounds solely present in MM, <sup>(b)</sup> chemicals found in MM and bacterial supernatants with no statistically significant difference in their concentrations, and <sup>(c)</sup> exo-metabolites not detected in MM.

| Molecules                          | p-values               | p-values adjusted      |                        |                        |                        |                        |
|------------------------------------|------------------------|------------------------|------------------------|------------------------|------------------------|------------------------|
|                                    |                        | MM/CFN299              | MM/CIAT899             | MM/CFNEI156            | MM/CFN42               | MM/CH24-10             |
| Glutamate                          | $5.48 \times 10^{-10}$ | $2.80 \times 10^{-10}$ | $4.60 \times 10^{-06}$ | $1.78 \times 10^{-03}$ | $4.26 \times 10^{-04}$ | $1.07 \times 10^{-03}$ |
| Sucrose                            | $2.04 \times 10^{-07}$ | $9.51 \times 10^{-08}$ | $1.88 \times 10^{-06}$ | $1.62 \times 10^{-03}$ | $3.82 \times 10^{-05}$ | $4.13 \times 10^{-04}$ |
| 3-Hydroxyisovalerate               | $1.77 \times 10^{-03}$ | $7.88 \times 10^{-01}$ | $9.99 \times 10^{-01}$ | $9.20 \times 10^{-01}$ | $1.58 \times 10^{-03}$ | $7.90 \times 10^{-01}$ |
| 2-Oxoglutarate                     | $4.20 \times 10^{-07}$ | $1.45 \times 10^{-03}$ | $7.14 \times 10^{-01}$ | $1.64 \times 10^{-02}$ | $7.00 \times 10^{-07}$ | $1.54 \times 10^{-02}$ |
| Homoserine                         | $9.78 \times 10^{-10}$ | $9.15 \times 10^{-09}$ | $6.45 \times 10^{-01}$ | $2.81 \times 10^{-01}$ | $1.37 \times 10^{-02}$ | $3.83 \times 10^{-04}$ |
| Glucose                            | $1.79 \times 10^{-09}$ | $3.04 \times 10^{-08}$ | $1.75 \times 10^{-07}$ | $3.61 \times 10^{-01}$ | $3.04 \times 10^{-08}$ | $9.30 \times 10^{-08}$ |
| Formate                            | $8.47 \times 10^{-04}$ | $2.99 \times 10^{-03}$ | $1.30 \times 10^{-03}$ | $1.06 \times 10^{-02}$ | $5.49 \times 10^{-01}$ | $2.29 \times 10^{-01}$ |
| Acetate                            | $8.46 \times 10^{-04}$ | $8.49 \times 10^{-01}$ | $8.73 \times 10^{-04}$ | $1.97 \times 10^{-01}$ | $2.23 \times 10^{-02}$ | $9.89 \times 10^{-01}$ |
| Threonine <sup>(a)</sup>           | $2.37 \times 10^{-11}$ | -                      | -                      | -                      | -                      | -                      |
| Alanine <sup>(a)</sup>             | $5.87 \times 10^{-13}$ | -                      | -                      | -                      | -                      | -                      |
| Valine <sup>(a)</sup>              | $3.77 \times 10^{-10}$ | -                      | -                      | -                      | -                      | -                      |
| Ethanol <sup>(b)</sup>             | $1.58 \times 10^{-01}$ | -                      | -                      | -                      | -                      | -                      |
| N,N-Dimethylglycine <sup>(b)</sup> | $7.38 \times 10^{-02}$ | -                      | -                      | -                      | -                      | -                      |
| Pyroglutamate <sup>(b)</sup>       | $1.44 \times 10^{-01}$ | -                      | -                      | -                      | -                      | -                      |
| Trehalose <sup>(c)</sup>           | $3.90 \times 10^{-23}$ | -                      | -                      | -                      | -                      | -                      |

|                                            |                          |   |   |   |   |   |
|--------------------------------------------|--------------------------|---|---|---|---|---|
| 3-Hydroxy-3-methylglutarate <sup>(c)</sup> | 1.16 x 10 <sup>-20</sup> | - | - | - | - | - |
| Maltose <sup>(c)</sup>                     | 1.87 x 10 <sup>-14</sup> | - | - | - | - | - |
| Malonate <sup>(c)</sup>                    | 5.41 x 10 <sup>-12</sup> | - | - | - | - | - |
| Glucose-1-phosphate <sup>(c)</sup>         | 3.57 x 10 <sup>-11</sup> | - | - | - | - | - |
| Aspartate <sup>(c)</sup>                   | 4.69 x 10 <sup>-11</sup> | - | - | - | - | - |
| 3-Methylglutarate <sup>(c)</sup>           | 4.03 x 10 <sup>-08</sup> | - | - | - | - | - |
| Tartrate <sup>(c)</sup>                    | 3.06 x 10 <sup>-07</sup> | - | - | - | - | - |
| Gluconate <sup>(c)</sup>                   | 5.50 x 10 <sup>-07</sup> | - | - | - | - | - |
| S-Adenosylhomocysteine <sup>(c)</sup>      | 9.50 x 10 <sup>-07</sup> | - | - | - | - | - |
| Methanol <sup>(c)</sup>                    | 2.60 x 10 <sup>-06</sup> | - | - | - | - | - |
| 3-Hydroxybutyrate <sup>(c)</sup>           | 4.38 x 10 <sup>-06</sup> | - | - | - | - | - |
| Ornithine <sup>(c)</sup>                   | 8.97 x 10 <sup>-06</sup> | - | - | - | - | - |
| Methionine <sup>(c)</sup>                  | 1.78 x 10 <sup>-05</sup> | - | - | - | - | - |
| Dimethyl sulfone <sup>(c)</sup>            | 1.97 x 10 <sup>-05</sup> | - | - | - | - | - |
| Caprylate <sup>(c)</sup>                   | 2.39 x 10 <sup>-05</sup> | - | - | - | - | - |
| Acetone <sup>(c)</sup>                     | 1.47 x 10 <sup>-03</sup> | - | - | - | - | - |
| Lactate <sup>(c)</sup>                     | 2.13 x 10 <sup>-02</sup> | - | - | - | - | - |

---
